# Supplementary material for: Understanding the stereoselectivity in Brønsted acid catalysed Povarov reactions generating cis/trans CF3-substituted tetrahydroquinolines: a DFT study
Source: Royal Society of Chemistry journal article supplement (doi:10.1039/c5ra27650k), 2016-01-01
Supplement: c5ra27650k1.pdf [file c5ra27650k1.pdf]

## Supplementary Information

### Understanding the stereoselectivity in Brønsted acid catalysed Povarov reactions generating *cis/trans* CF<sub>3</sub>-substituted tetrahydroquinolines: a DFT study

Luis R. Domingo,<sup>\*a</sup> Mar Ríos-Gutiérrez<sup>a</sup> and Saeedreza Emamian<sup>b</sup>

<sup>a</sup> *Department of Organic Chemistry, University of Valencia, Dr. Moliner 50, E-46100  
Burjassot, Valencia, Spain.*

<sup>b</sup> *Chemistry Department, Shahrood Branch, Islamic Azad University, Shahrood, Iran.*

e-mail: [domingo@utopia.uv.es](mailto:domingo@utopia.uv.es)

web: [www.luisrdomingo.com](http://www.luisrdomingo.com)

#### Index

- S2** **Table S1.** M06-2X/6-31G(d) total and relative energies, in gas phase and in DCE, of the stationary points involved in the Povarov reaction between protonated imine **8:H** and VPO **9a**.
- S3** **Table S2.** M06-2X/6-31G(d) enthalpies, entropies and Gibbs free energies, and the relative ones, computed at 298 K and 1 atm in DCE, of the stationary points involved in the Povarov reaction between protonated imine **8:H** and VPO **9a**.
- S4** **Table S3.** M06-2x/6-31G(d) and B3LYP/6-31G(d) total and relative energies of the stereoisomeric TSs associated with the nucleophilic attack of ER ethylenes **9a** and **9b** on protonated imine **8:H**.
- S5** **Figure S1.** M06-2X/6-31G(d) and B3LYP/6-31(d) optimised geometries of the TSs involved in the Povarov reaction of protonated imine **8:H** with ATMS **9b**.
- S6** Theoretical background of NCI analysis.

**Table S1.** M06-2X/6-31G(d) total (E, in a.u.) and relative<sup>a, b</sup> ( $\Delta E$ , in kcal·mol<sup>-1</sup>) energies, in gas phase and in DCE, of the stationary points involved in the Povarov reaction between protonated imine **8:H** and VPO **9a**.

|                           | <i>Gas phase</i> |                    | <i>Solvent</i> |                    |
|---------------------------|------------------|--------------------|----------------|--------------------|
|                           | E                | $\Delta E$         | E              | $\Delta E$         |
| <b>8:H</b>                | -893.811209      |                    | -893.879383    |                    |
| <b>9a</b>                 | -363.867846      |                    | -363.874647    |                    |
| <b>MC1n</b>               | -1257.701296     | -14.0              | -1257.766671   | -7.9               |
| <b>MC1x</b>               | -1257.701283     | -13.9              | -1257.763900   | -6.2               |
| <b>TS1n</b>               | -1257.694824     | -9.9               | -1257.758843   | -3.0               |
| <b>TS1x</b>               | -1257.691422     | -7.8               | -1257.755831   | -1.1               |
| <b>IN1n</b>               | -1257.712118     | -20.7              | -1257.778102   | -15.1              |
| <b>IN1x</b>               | -1257.701992     | -14.4              | -1257.771074   | -10.7              |
| <b>TS2n</b>               | -1257.710186     | -19.5              | -1257.774445   | -12.8              |
| <b>TS2x</b>               | -1257.700278     | -13.3              | -1257.764540   | -6.6               |
| <b>IN2n</b>               | -1257.717934     | -24.4              | -1257.785989   | -20.1              |
| <b>IN2x</b>               | -1257.717060     | -23.8              | -1257.784633   | -19.2              |
| <b>MC2n</b>               | -3084.667577     |                    | -3084.691966   |                    |
| <b>MC2x</b>               | -3084.655866     |                    | -3084.666075   |                    |
| <b>TS3n</b>               | -3084.656458     | 7.0 <sup>b</sup>   | -3084.680196   | 7.4 <sup>b</sup>   |
| <b>TS3x</b>               | -3084.646881     | 5.6 <sup>b</sup>   | -3084.666075   | 10.9 <sup>b</sup>  |
| <i>cis</i> - <b>10a</b>   | -3084.689771     | -13.9 <sup>b</sup> | -3084.705065   | -8.2 <sup>b</sup>  |
| <i>trans</i> - <b>10a</b> | -3084.693610     | -23.7 <sup>b</sup> | -3084.707518   | -15.1 <sup>b</sup> |

<sup>a</sup> Relative to protonated imine **8:H** and VPO **9a**.

<sup>b</sup> Relative to the corresponding molecular complex **MC2n** or **MC2x**.

**Table S2.** M06-2X/6-31G(d) enthalpies (H, in a.u.), entropies (S, in cal·mol<sup>-1</sup>·K<sup>-1</sup>) and Gibbs free energies (G, in a.u.), and the relative<sup>a, b</sup> ones ( $\Delta H$  in kcal·mol<sup>-1</sup>,  $\Delta S$  in cal·mol<sup>-1</sup>·K<sup>-1</sup> and  $\Delta G$  in kcal·mol<sup>-1</sup>), computed at 298 K and 1 atm in DCE, of the stationary points involved in the Povarov reaction between protonated imine **8:H** and VPO **9a**.

|                           | H            | $\Delta H$         | S     | $\Delta S$        | G            | $\Delta G$         |
|---------------------------|--------------|--------------------|-------|-------------------|--------------|--------------------|
| <b>8:H</b>                | -893.638977  |                    | 126.6 |                   | -893.699124  |                    |
| <b>9a</b>                 | -363.720205  |                    | 84.6  |                   | -363.760423  |                    |
| <b>MC1n</b>               | -1257.369442 | -6.4               | 169.8 | -41.4             | -1257.450125 | 5.9                |
| <b>MC1x</b>               | -1257.366860 | -4.8               | 180.4 | -30.8             | -1257.452594 | 4.4                |
| <b>TS1n</b>               | -1257.364342 | -3.2               | 160.6 | -50.7             | -1257.440634 | 11.9               |
| <b>TS1x</b>               | -1257.360533 | -0.8               | 158.3 | -52.9             | -1257.435763 | 14.9               |
| <b>IN1n</b>               | -1257.381562 | -14.0              | 155.4 | -55.9             | -1257.455379 | 2.6                |
| <b>IN1x</b>               | -1257.374230 | -9.4               | 160.5 | -50.7             | -1257.450493 | 5.7                |
| <b>TS2n</b>               | -1257.377043 | -11.2              | 152.3 | -59.0             | -1257.449391 | 6.4                |
| <b>TS2x</b>               | -1257.368153 | -5.6               | 151.8 | -59.5             | -1257.440256 | 12.1               |
| <b>IN2n</b>               | -1257.386802 | -17.3              | 158.8 | -52.4             | -1257.462263 | -1.7               |
| <b>IN2x</b>               | -1257.385320 | -16.4              | 161.4 | -49.8             | -1257.462002 | -1.5               |
| <b>MC2n</b>               | -3084.220492 |                    | 230.5 |                   | -3084.330025 |                    |
| <b>MC2x</b>               | -3084.210838 |                    | 231.5 |                   | -3084.320810 |                    |
| <b>TS3n</b>               | -3084.213197 | 4.6 <sup>b</sup>   | 238.0 | 7.5 <sup>b</sup>  | -3084.326294 | 2.3 <sup>b</sup>   |
| <b>TS3x</b>               | -3084.198998 | 7.4 <sup>b</sup>   | 227.2 | -4.3 <sup>b</sup> | -3084.306945 | 8.7 <sup>b</sup>   |
| <i>cis</i> - <b>10a</b>   | -3084.233720 | -8.3 <sup>b</sup>  | 239.9 | 9.4 <sup>b</sup>  | -3084.347704 | -11.1 <sup>b</sup> |
| <i>trans</i> - <b>10a</b> | -3084.235202 | -15.3 <sup>b</sup> | 231.9 | 0.4 <sup>b</sup>  | -3084.345366 | -15.4 <sup>b</sup> |

<sup>a</sup> Relative to protonated imine **8:H** and VPO **9a**.

<sup>b</sup> Relative to the corresponding molecular complex **MC2n** or **MC2x**.

**Table S3.** M06-2X/6-31G(d) and B3LYP/6-31G(d) total (E, in a.u.) and relative ( $\Delta E$ , in kcal·mol<sup>-1</sup>) energies of the stereoisomeric TSs associated with the nucleophilic attack of ER ethylenes **9a** and **9b** on protonated imine **8**:H.

|                | M06-2X/6-31G(d) |            | B3LYP/6-31G(d) |            |
|----------------|-----------------|------------|----------------|------------|
|                | E               | $\Delta E$ | E              | $\Delta E$ |
| <b>TS1n</b>    | -1257.694824    | 0.0        | -1258.197913   | 0.0        |
| <b>TS1x</b>    | -1257.691422    | 2.1        | -1258.196269   | 1.3        |
| <b>TS1n-Si</b> | -1420.221780    | 0.0        | -1420.741061   | 0.0        |
| <b>TS1x-Si</b> | -1420.221201    | 0.4        | -1420.742513   | -0.9       |

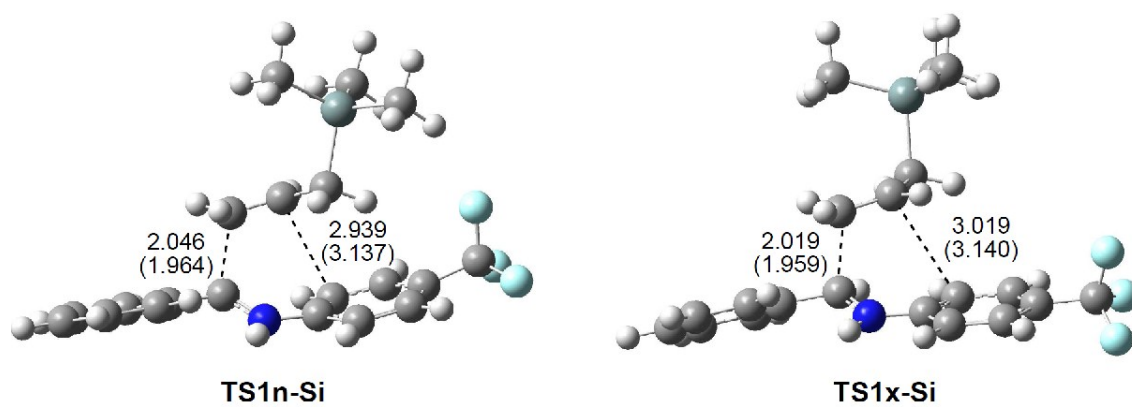

**Figure S1.** M06-2X/6-31G(d) optimized geometries of the TSs involved in the Povarov reaction of protonated imine **8:H** with ATMS **9b** including the lengths of the C4-C6 and C1-C5 forming bonds in Å. The B3LYP/6-31(d) lengths are given in parenthesis.

## Theoretical background of NCI analysis

NCIs have a unique profile and their presence can be revealed solely by means of the electron-density analysis. They are highly non-local and manifest in real space as low-gradient isosurfaces with low densities. The sign of the Laplacian of the density,  $\nabla^2\rho$ , is a widely used tool to distinguish between different types of strong interactions. To analyse bonding in more detail, the Laplacian is often decomposed into a sum of contributions. These components are the three eigenvalues  $\lambda_i$  of the electron-density Hessian matrix, such that  $\nabla^2\rho = \lambda_1 + \lambda_2 + \lambda_3$ . Analysis of these components has been widely applied to chemical bonding. The sign of  $\lambda_2$  can be used to distinguish bonded ( $\lambda_2 < 0$ ) from non-bonded ( $\lambda_2 > 0$ ) interactions. Analysis of the sign of  $\lambda_2$  thus helps to differentiate between different types of NCIs, whereas the density itself provides information about their strength.

The gradient isosurfaces provide a useful visualisation of NCIs as broad regions of real space, rather than simple pairwise contacts between atoms, and are coloured according to the corresponding values of  $\text{sign}(\lambda_2)\rho$ . Surfaces with very low density values ( $\rho < |0.005|$  a.u.) generally represent weaker dispersion interactions, while surfaces with slightly higher density values ( $|0.005| < \rho < |0.05|$  a.u.) represent stronger NCIs, including both attractive HBs and steric clashes. Thus, large negative values of  $\text{sign}(\lambda_2)\rho$  are indicative of attractive interactions (such as dipole-dipole or hydrogen bonding) and are coloured in blue, while if  $\text{sign}(\lambda_2)\rho$  is large and positive, the interactions are non-bonding and are coloured in red; values near zero indicate very weak van der Waals interactions, and are coloured in green.

E. R. Johnson, S. Keinan, P. Mori-Sanchez, J. Contreras-Garcia, J. Cohen and A. W. Yang, *J. Am. Chem. Soc.*, 2010, **132**, 6498
